# Supplementary material for: General, 21-Day Postoperative Rehabilitation Program Has Beneficial Effect on Oxidative Stress Markers in Patients after Total Hip or Knee Replacement
Source: Hindawi journal article supplement (doi:10.1155/2020/4598437), 2020-09-25
Supplement: f1 [file 4598437.f1.pdf]

## SUPPLEMENTARY MATERIALS

### General, 21-day postoperative rehabilitation program has beneficial effect on oxidative stress markers in patients after total hip or knee replacement

Bronisława Skrzep-Poloczek,<sup>1</sup> Jakub Poloczek,<sup>2</sup> Elżbieta Chelmecka,<sup>3</sup> Wojciech Kazura,<sup>1</sup> Agnieszka Dulcka,<sup>4</sup> Maciej Idzik,<sup>5</sup> Jerzy Jochem,<sup>1</sup> and Dominika Stygar<sup>1</sup>

<sup>1</sup> Department of Physiology, Faculty of Medical Sciences in Zabrze, Jordana Street 19, 41-808 Zabrze, Medical University of Silesia, Katowice, Poland.

<sup>2</sup> Department of Rehabilitation, 3rd Specialist Hospital in Rybnik, Energetyków 46 Street, 44-200 Rybnik, Poland.

<sup>3</sup> Department of Statistics, Department of Instrumental Analysis, Faculty of Pharmaceutical Sciences in Sosnowiec, Ostrogórska 31 Street, 41-200 Sosnowiec, Medical University of Silesia, Katowice, Poland.

<sup>4</sup> Department of Pregnancy Pathology, Department of Woman's Health, School of Health Sciences in Katowice, Stefana Batorego 18, 41-902, Bytom, Medical University of Silesia, Katowice, Poland.

<sup>5</sup> Independent Public Health Care, Opole Cancer Center prof. Tadeusz Koszarowski, Katowicka 45-061 Street, 46-020, Opole, Poland.

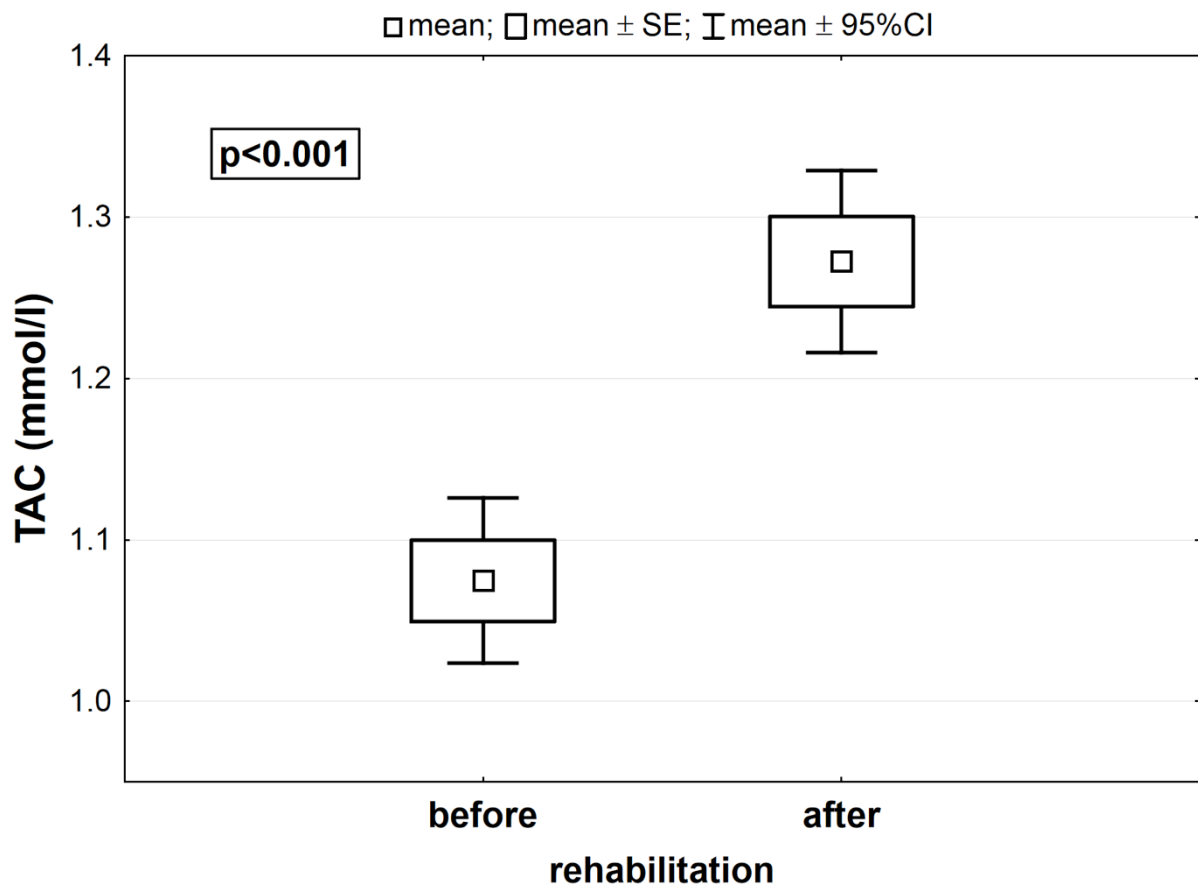

**Figure S1.** Total antioxidant capacity (TAC) (mmol/l) in the serum of patients (n =36) with hip or knee endoprosthesis before and after a 21-day general rehabilitation program. Symbols used in the plot: inner box – mean value, outer box – mean value  $\pm$  standard error, whiskers – mean value  $\pm$  confidence interval.

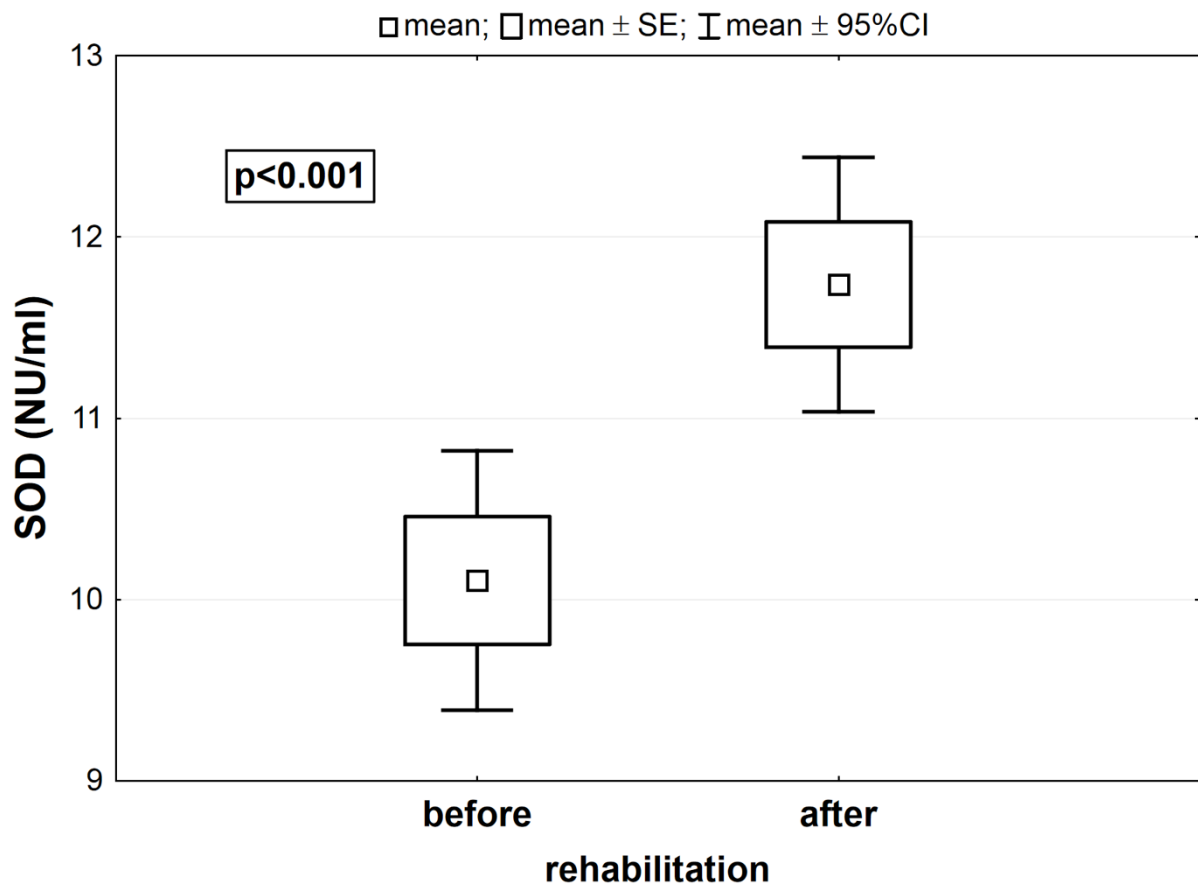

**Figure S2.** Total superoxide dismutase (SOD) activity (NU/ml) in the serum of patients (n = 36) with hip or knee endoprosthesis before and after a 21-day general rehabilitation program. Symbols used in the plot: inner box – mean value, outer box – mean value ± standard error, whiskers – mean value ± confidence interval.

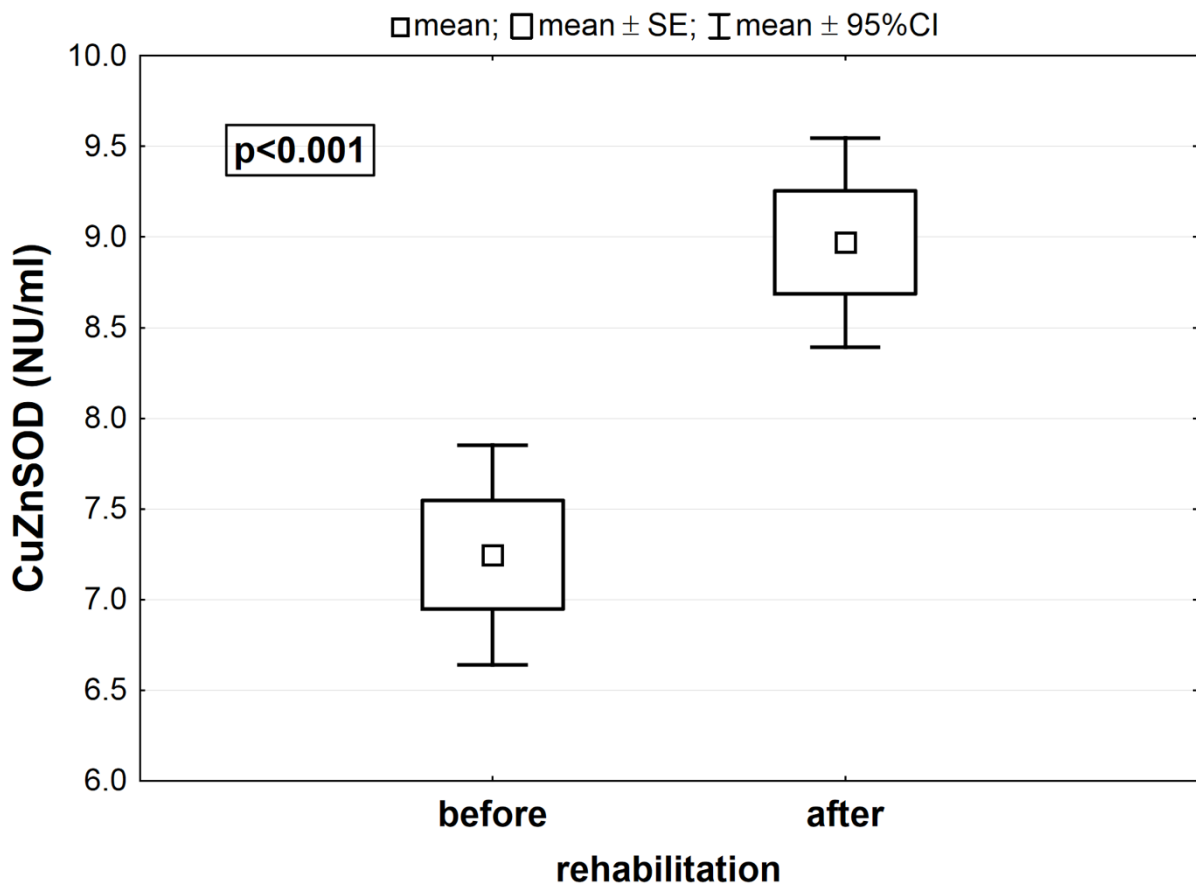

**Figure S3.** Cu-Zn superoxide dismutase (CuZnSOD) activity (NU/ml) in the serum of patients (n = 36) with hip or knee endoprosthesis before and after a 21-day general rehabilitation program. Symbols used in the plot: inner box – mean value, outer box – mean value ± standard error, whiskers – mean value ± confidence interval.

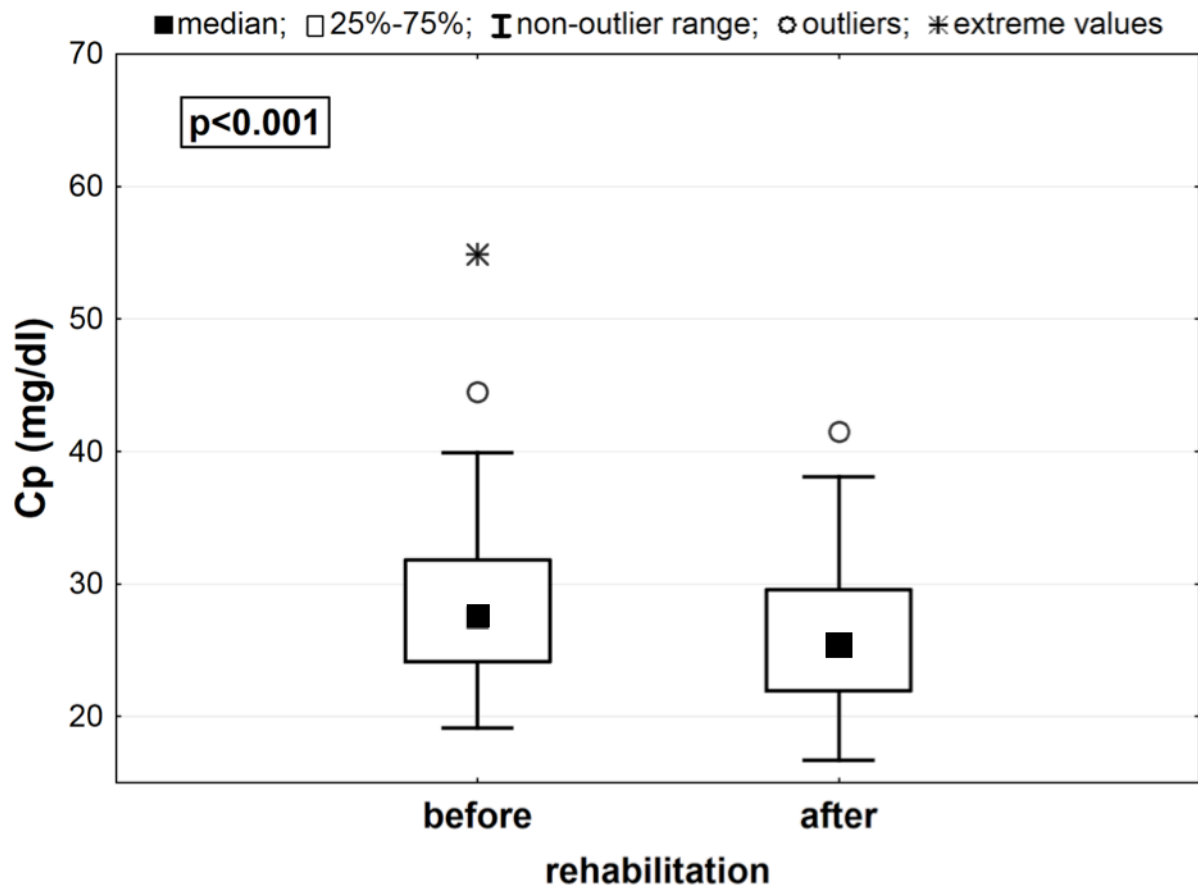

**Figure S4.** Ceruloplasmin (Cp) concentration (mg/ml) in the serum of patients (n = 36) with hip or knee endoprosthesis before and after a 21-day general rehabilitation program. Symbols used in the plot: inner box – median value, outer box – first quartile – third quartile, whiskers – non-outlier range, circle – outliers, \* – extreme values.

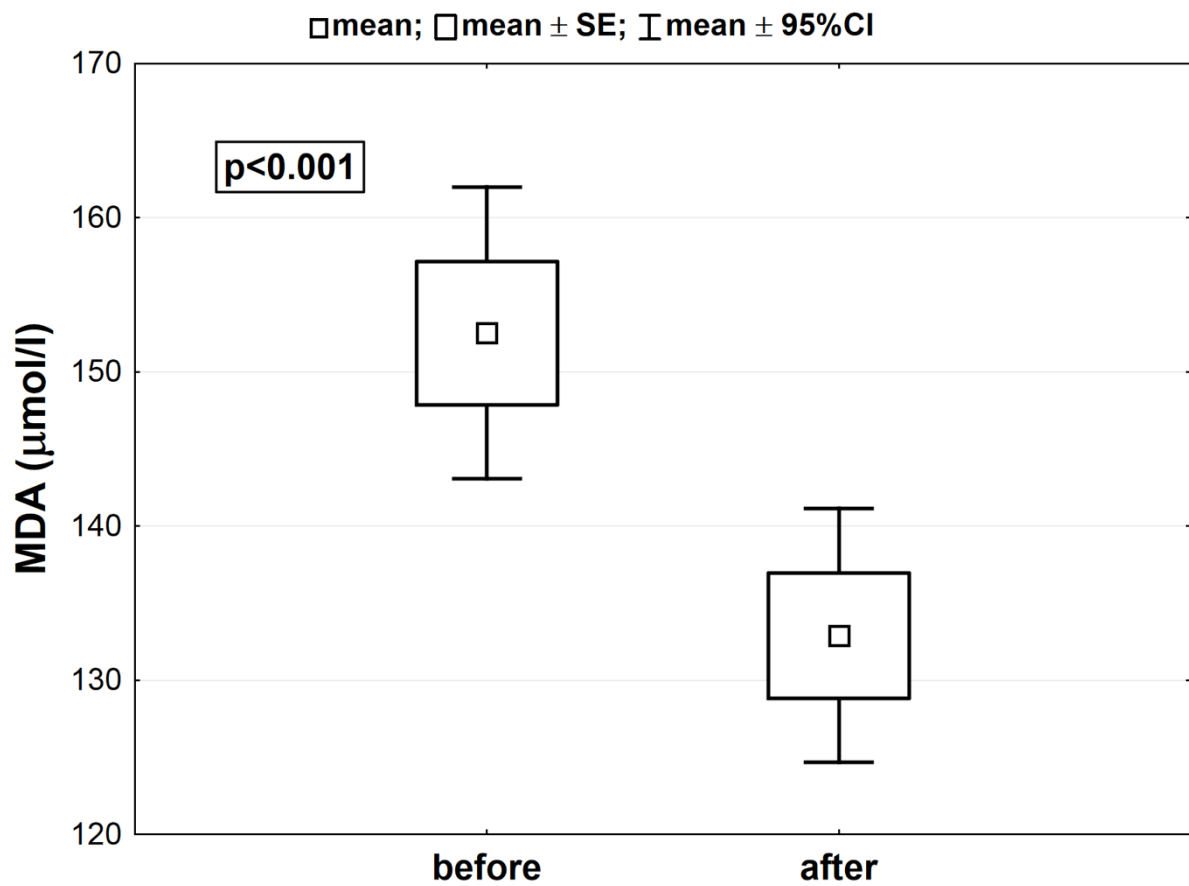

**Figure S5.** Malondialdehyde (MDA) concentration ( $\mu\text{mol/l}$ ) in the serum of patients ( $n = 36$ ) with hip or knee endoprosthesis before and after a 21-day general rehabilitation program. Symbols used in the plot: inner box – mean value, outer box – mean value  $\pm$  standard error, whiskers – mean value  $\pm$  confidence interval.

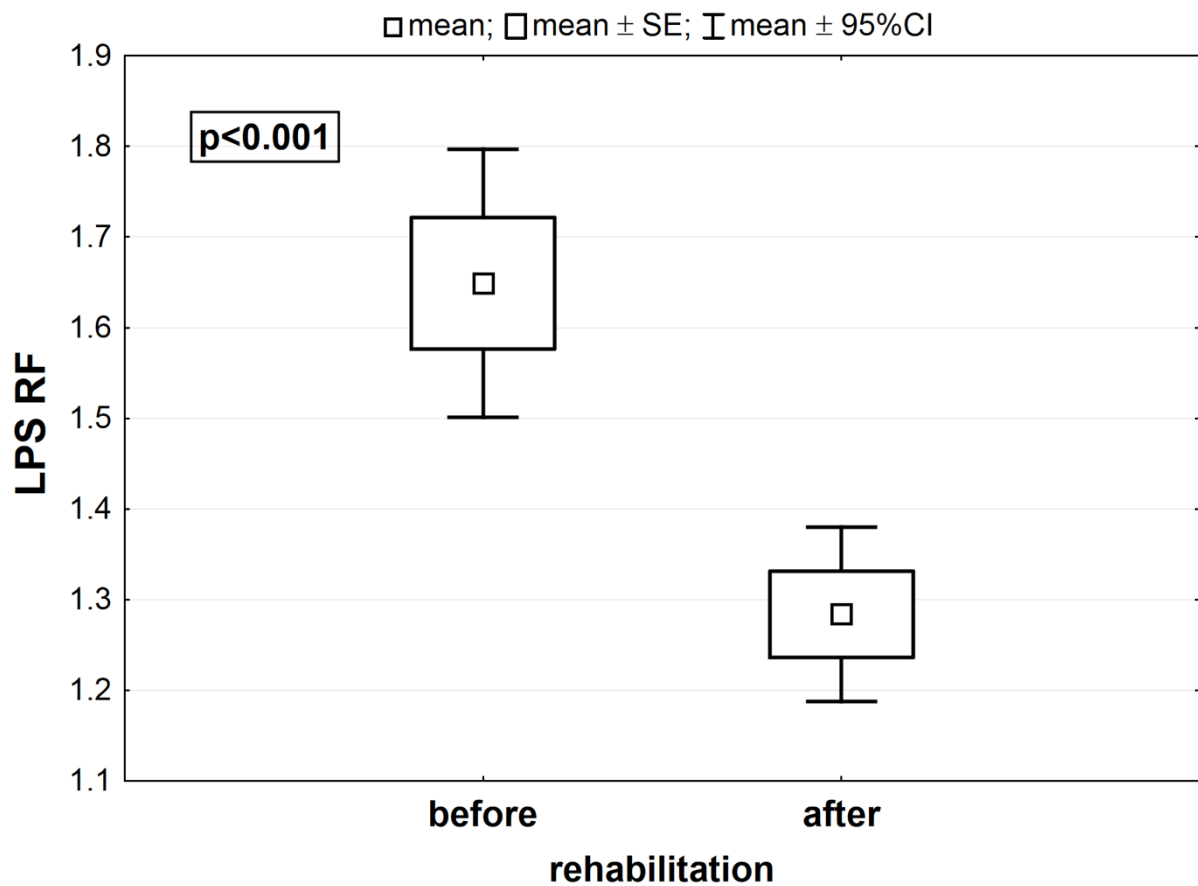

**Figure S6.** Lipofuscin (LPS) concentration (RF) in the serum of patients (n = 36) with hip or knee ednoprosthesis before and after a 21-day general rehabilitation program. Abbreviations: RF – radiofrequency. Symbols used in the plot: inner box – mean value, outer box – mean value ± standard error, whiskers – mean value ± confidence interval.
